# Supplementary material for: Adsorption of Aun (n = 1–4) clusters on Fe3O4(001) B-termination
Source: Royal Society of Chemistry journal article supplement (doi:10.1039/c5ra06294b), 2015-01-01

## Supporting Information

### Adsorption of Au<sub>n</sub> (n = 1-4) clusters on Fe<sub>3</sub>O<sub>4</sub>(001) B-termination

*Xiaohu Yu,<sup>a,b\*</sup> Xuemei Zhang,<sup>b</sup> Shengguang Wang<sup>b,c</sup>, Gang Feng<sup>b,d,e\*</sup>*

*a) College of Physics and Electrical Engineering, Anyang Normal University, Anyang, Henan, 455000, People's Republic of China; b) State Key Laboratory of Coal Conversion, Institute of Coal Chemistry, Chinese Academy of Sciences, Taiyuan, Shanxi 030001, China; c) China Synfuels China Co., Ltd., Huairou, Beijing 101407, P.R. China; d) Shanghai Research Institute of Petrochemical Technology SINOPEC, 201208, Shanghai, P.R. China; e) College of Chemistry, Nanchang University, Nanchang, Jiangxi 330031 P.R. China;*

### Corresponding authors:

Xiaohu Yu Tel:+86 372 2900041; fax: +86 372 2900041; Email: [yuxiaohu950203@126.com](mailto:yuxiaohu950203@126.com)

Gang Feng Tel:+86 21 68462197; fax:+86 21 68462283; Email: [fengg.sshy@sinopec.com](mailto:fengg.sshy@sinopec.com)

**Fig. S1.** Stable configurations of single Au atom adsorption on stoichiometric  $\text{Fe}_3\text{O}_4(001)$  surface. (red ball for oxygen atom; blue ball for iron atom; yellow ball for gold atom)

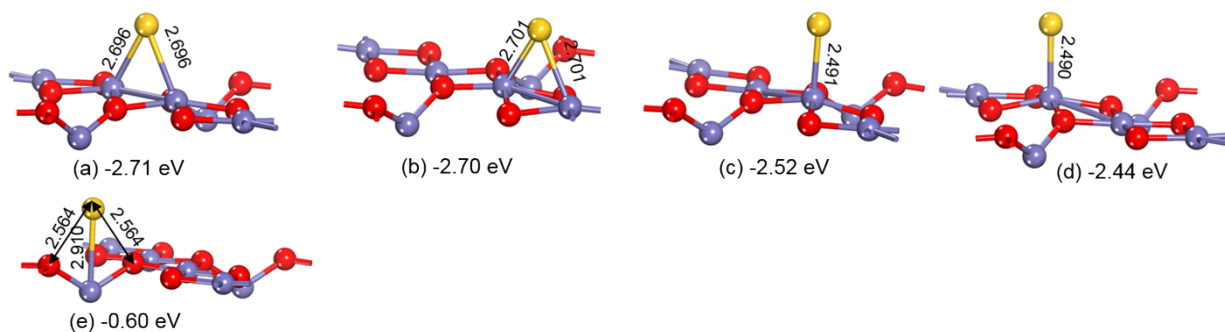

**Fig. S2.** Stable configurations of  $\text{Au}_2$  dimer adsorption on stoichiometric  $\text{Fe}_3\text{O}_4(001)$  surface. (red ball for oxygen atom; blue ball for iron atom; yellow ball for gold atom)

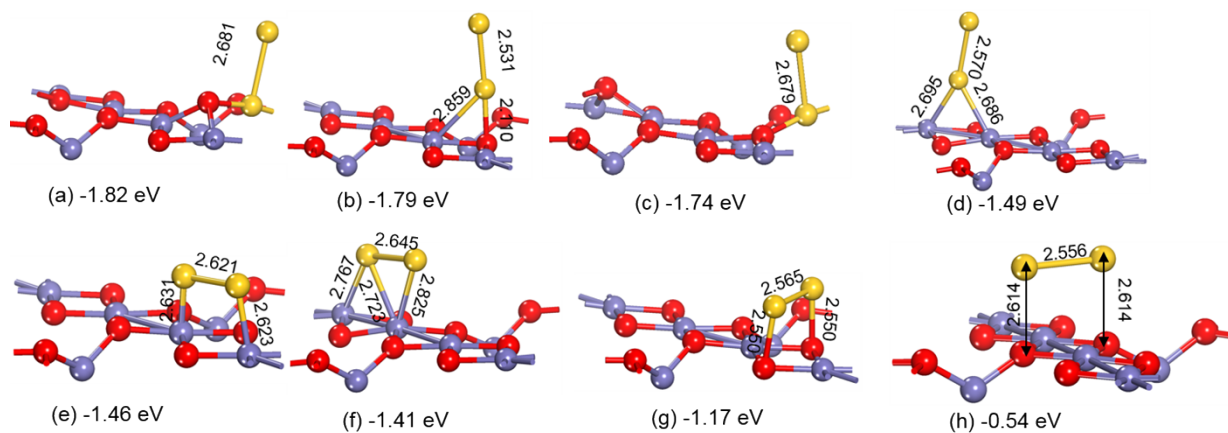

**Fig. S3.** Stable configurations of Au<sub>3</sub> trimer adsorption on stoichiometric Fe<sub>3</sub>O<sub>4</sub>(001) surface. (red ball for oxygen atom; blue ball for iron atom; yellow ball for gold atom)

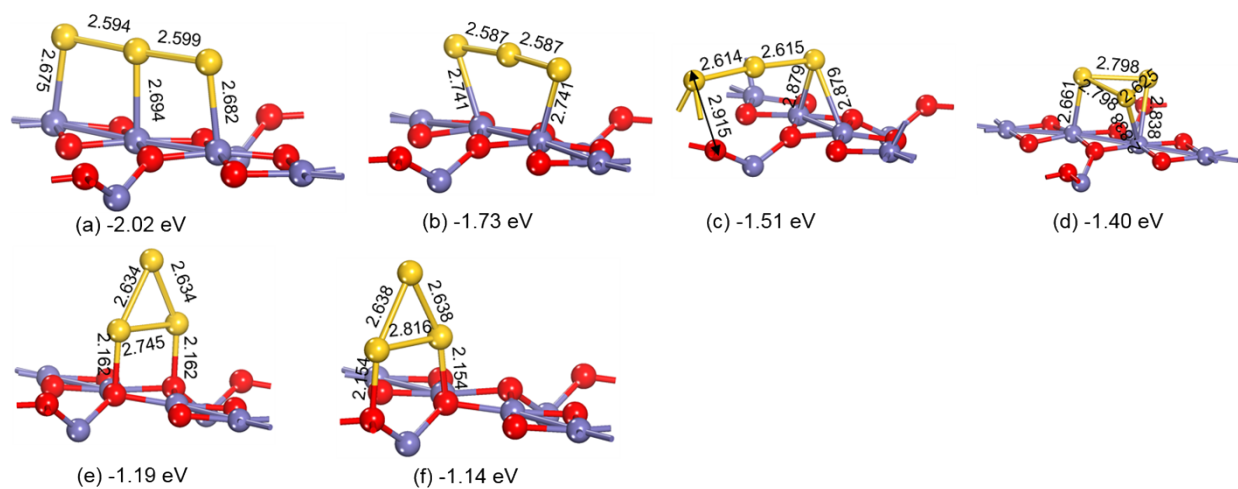

**Fig. S4.** Stable adsorption configurations of Au<sub>4</sub> tetramer adsorption on stoichiometric Fe<sub>3</sub>O<sub>4</sub>(001) surface. (red ball for oxygen atom; blue ball for iron atom; yellow ball for gold atom)

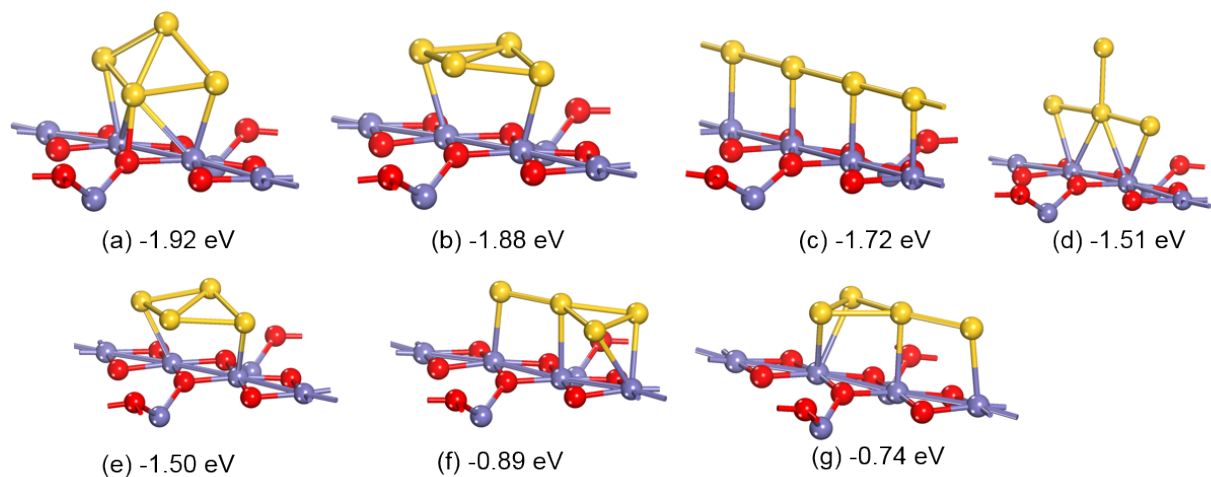

**Fig. S5.** Stable adsorption configurations of single Au atom adsorption on reduced  $\text{Fe}_3\text{O}_4(001)$  surface. (red ball for oxygen atom; blue ball for iron atom; yellow ball for gold atom)

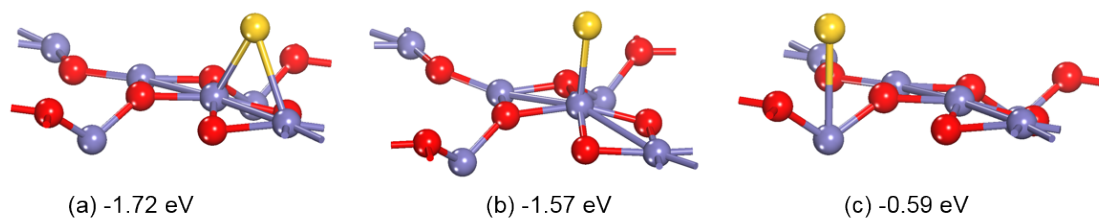

**Fig. S6.** Stable adsorption configurations of  $\text{Au}_2$  dimer adsorption on reduced  $\text{Fe}_3\text{O}_4(001)$  surface. (red ball for oxygen atom; blue ball for iron atom; yellow ball for gold atom)

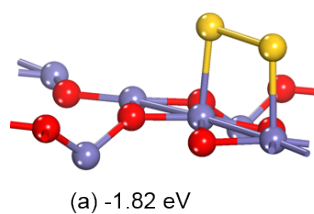

**Fig. S7.** Stable adsorption configurations of Au<sub>3</sub> trimer adsorption on reduced Fe<sub>3</sub>O<sub>4</sub>(001) surface. (red ball for oxygen atom; blue ball for iron atom; yellow ball for gold atom)

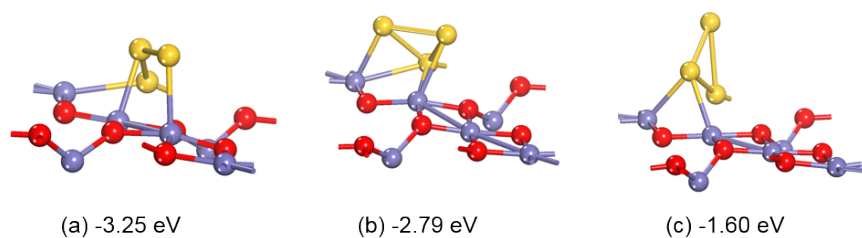

**Fig. S8.** Stable adsorption configurations of Au<sub>4</sub> tetramer adsorption on reduced Fe<sub>3</sub>O<sub>4</sub>(001) surface. (red ball for oxygen atom; blue ball for iron atom; yellow ball for gold atom)

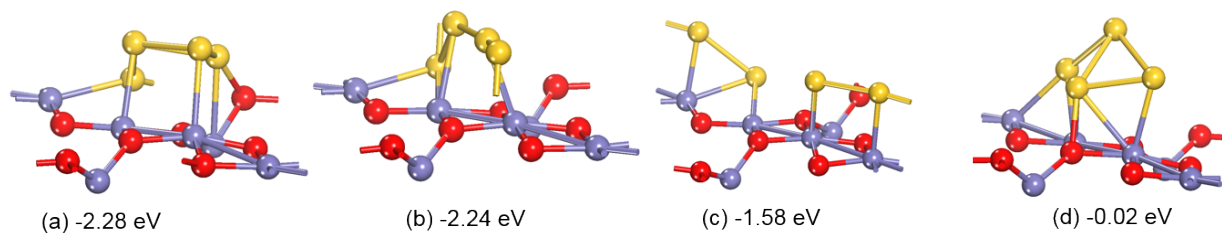

**Fig. S9.** Stable adsorption configurations of single Au atom adsorption on hydrated  $\text{Fe}_3\text{O}_4(001)$  surface. (red ball for oxygen atom; blue ball for iron atom; white ball for hydrogen atom and yellow ball for gold atom)

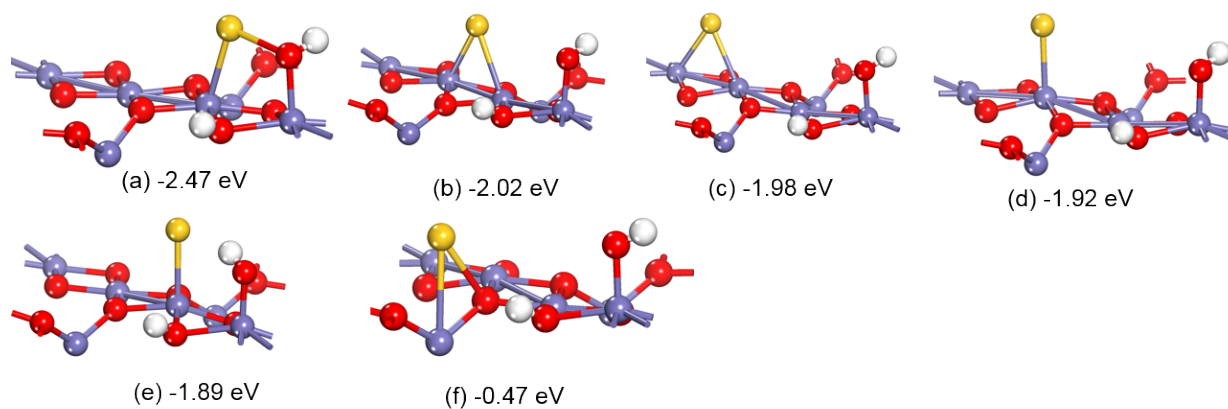

**Fig. S10.** Stable adsorption configurations of  $\text{Au}_2$  dimer adsorption on hydrated  $\text{Fe}_3\text{O}_4(001)$  surface. (red ball for oxygen atom; blue ball for iron atom; white ball for hydrogen atom and yellow ball for gold atom)

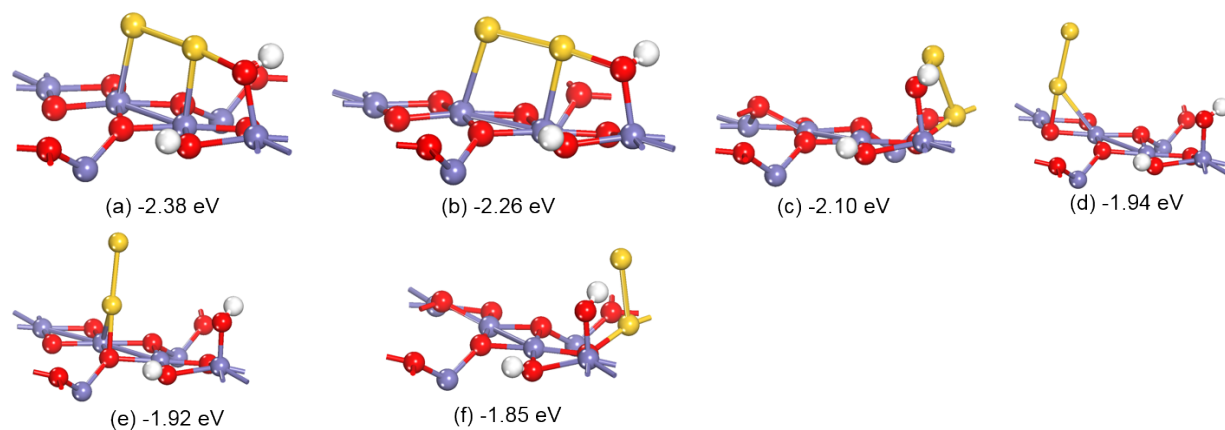

**Fig. S11.** Stable adsorption configurations of Au<sub>3</sub> trimer adsorption on hydrated Fe<sub>3</sub>O<sub>4</sub>(001) surface. (red ball for oxygen atom; blue ball for iron atom; white ball for hydrogen atom and yellow ball for gold atom)

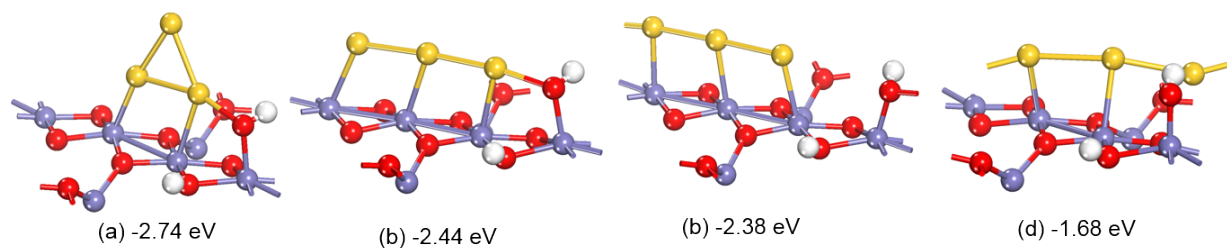

**Fig. S12.** Stable adsorption configurations of Au<sub>4</sub> tetramer adsorption on hydrated Fe<sub>3</sub>O<sub>4</sub>(001) surface. (red ball for oxygen atom; blue ball for iron atom; white ball for hydrogen atom and yellow ball for gold atom)

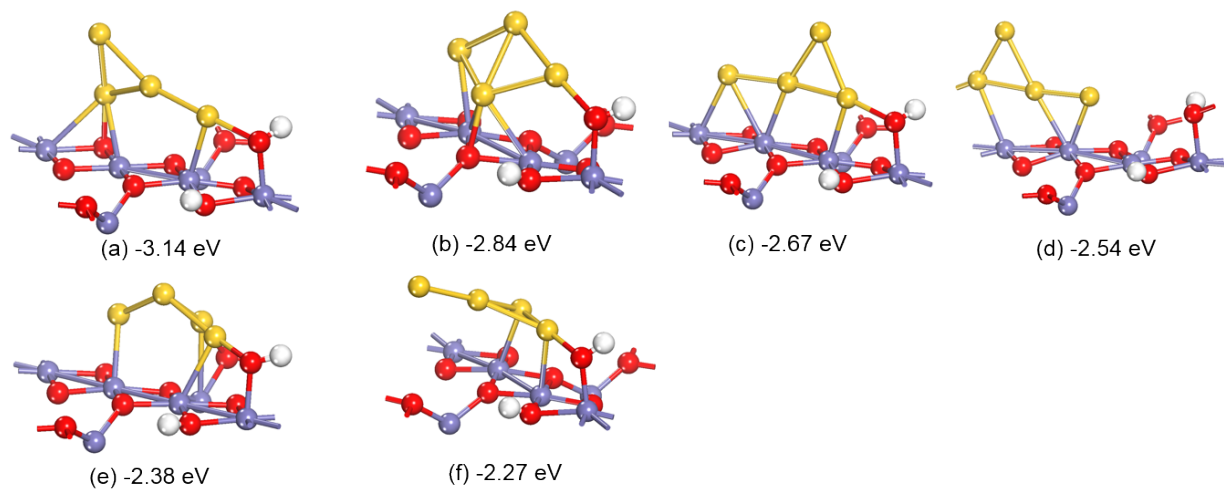

**Fig. S13.** Hydrogen spillover on the hydrated  $\text{Fe}_3\text{O}_4(001)$  B-termination with adsorption energy (eV), Au-Fe distances ( $\text{\AA}$ ), and the Bader charge of Au atoms (in parenthesis) (red ball for oxygen atom; blue ball for iron atom and yellow ball for gold atom)

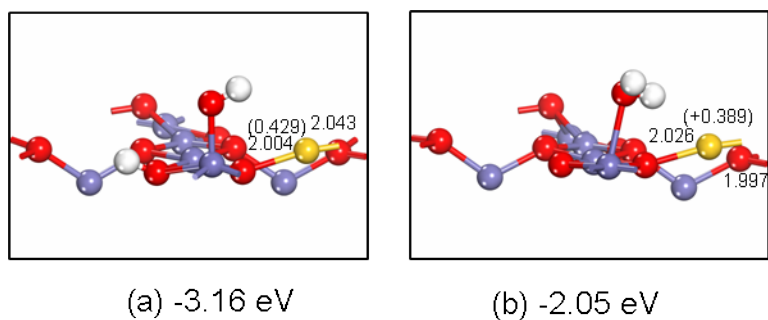



**Fig. S14.** The most stable atomic Au adsorption configurations on the  $\text{Fe}_3\text{O}_4(001)$  B-termination (A) stoichiometric surface; (B) reduced surface; (C) hydrated surface, with adsorption energy (eV), Au-Fe distances ( $\text{\AA}$ ), and the Bader charge of Au atoms (in parenthesis) (red ball for oxygen atom; blue ball for iron atom and yellow ball for gold atom)

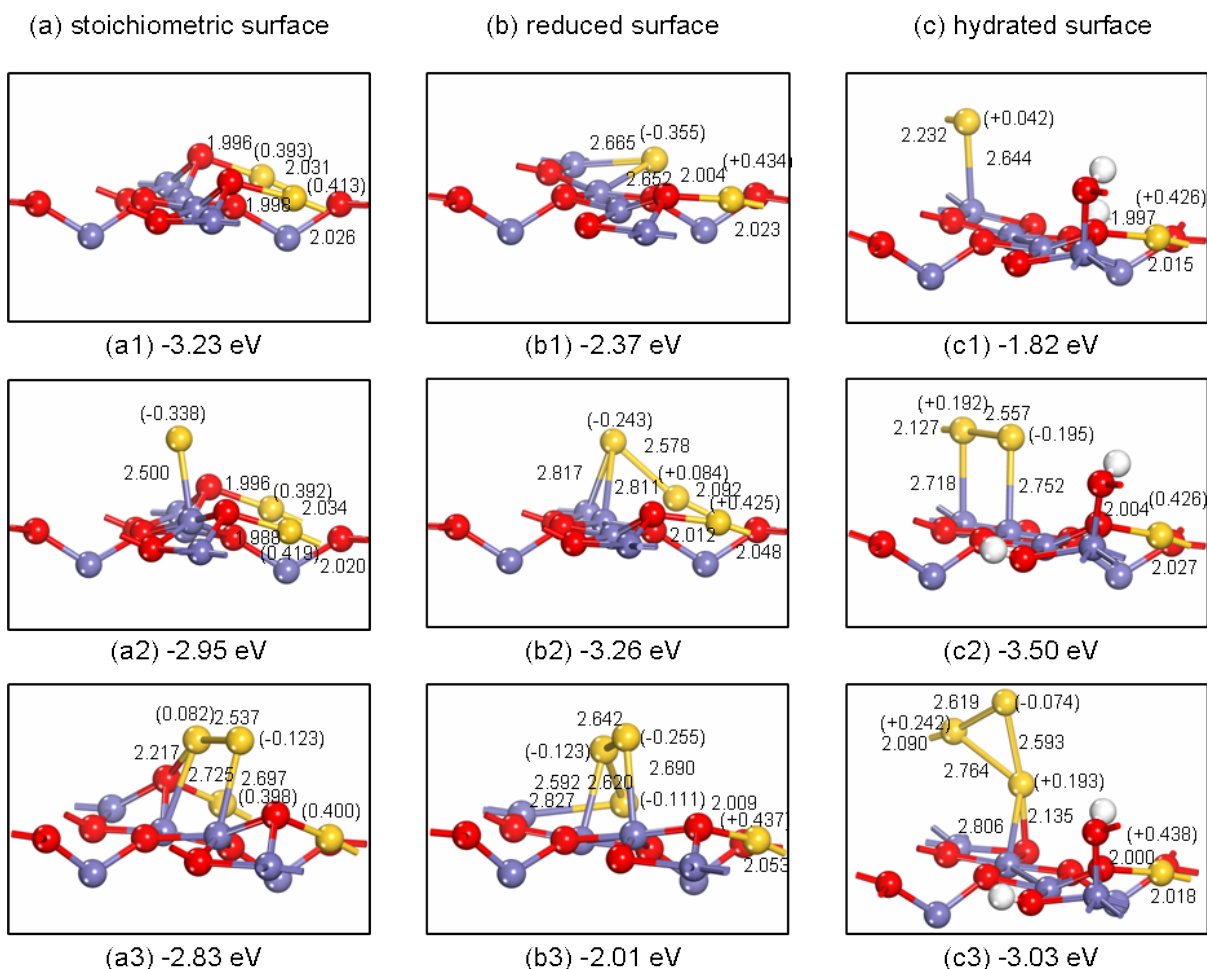

**Fig. S15.** Magnetic moments of Fe atoms for Au<sub>n</sub> (n=2-4) adsorption on the surfaces. (red ball for oxygen atom; blue ball for iron atom; white ball for hydrogen atom and yellow ball for gold atom)

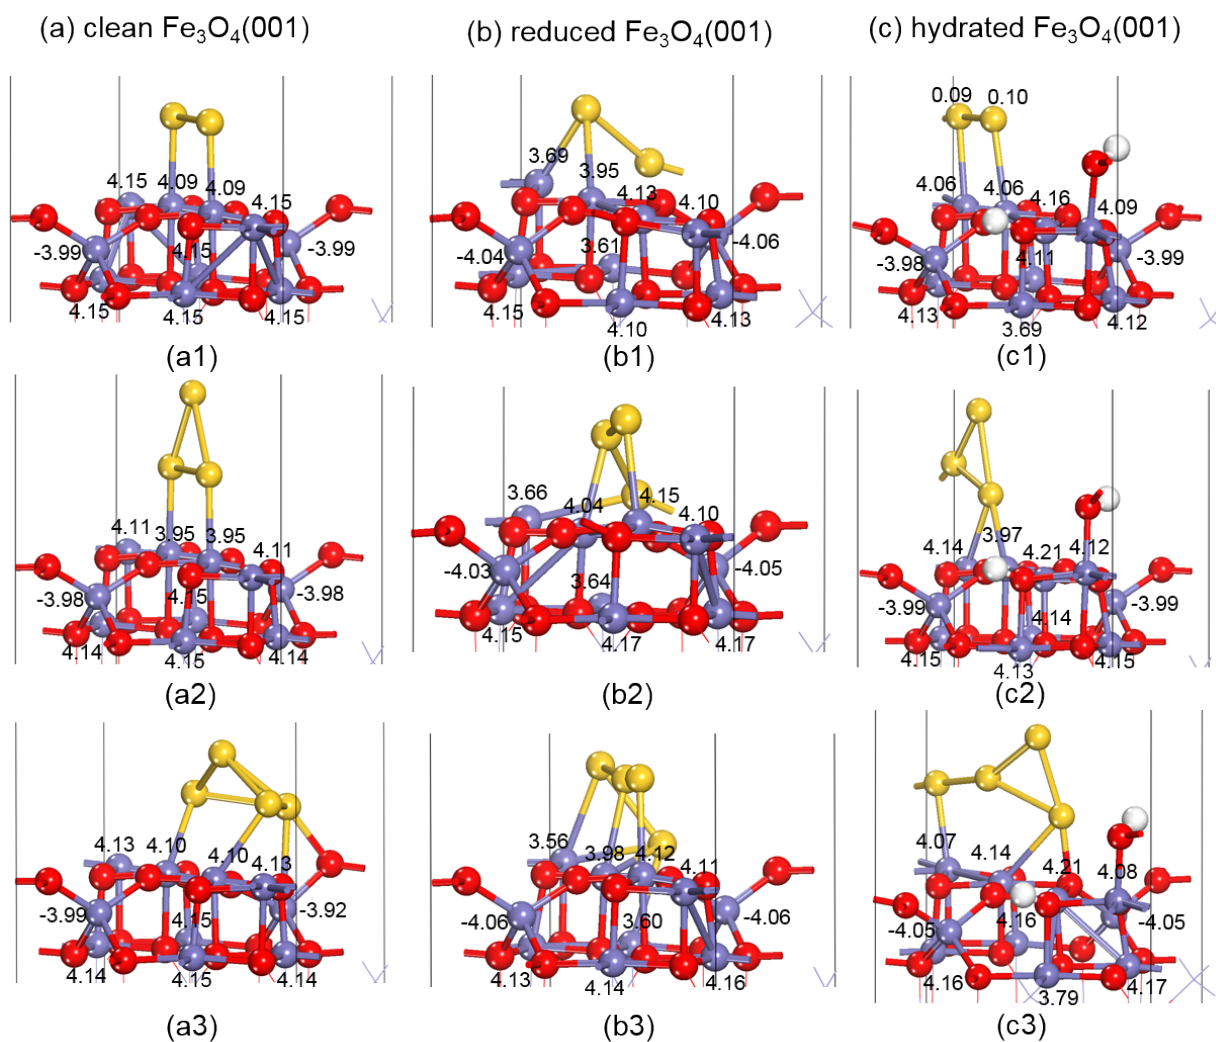

Supplement: c5ra06294b1.pdf [file c5ra06294b1.pdf]
